# Supplementary material for: Auf Nummer sicher? Sicherheitskultur und Patientensicherheit an deutschen anästhesiologischen Kliniken – Eine deutschlandweite Umfrage zum Status quo
Source: Springer Nature journal article supplement (doi:10.1007/s00101-021-01073-9), 2022-02-18
Supplement: MOESM1 [file 20148438]

**Zusatzmaterial zum Beitrag** „Auf Nummer sicher? Sicherheitskultur und Patientensicherheit an deutschen anästhesiologischen Kliniken – eine deutschlandweite Umfrage zum Status Quo“ von Marcus H, Golbeck W, Schieren M et al. (2021) in *Der Anaesthesist*.

Beitrag und Zusatzmaterial stehen Ihnen auf [www.springermedizin.de](http://www.springermedizin.de) zur Verfügung. Bitte geben Sie dort den Beitragstitel in die Suche ein.

## Fragebogen. Umfrage zum Thema Patientensicherheit und Sicherheitskultur in deutschen anästhesiologischen Kliniken

**A1** Meine Position in der Anästhesie im Krankenhaus:  
(Mehrfachnennungen möglich)

- a) Chefarzt
- b) Oberarzt
- c) Facharzt
- d) Assistenzarzt
- e) Ambulant tätig

**A2** Meine Klinik ist ein(e)

- a) Universitätsklinik
- b) Haus der Maximalversorgung
- c) Haus der Schwerpunktversorgung
- d) Haus der Grund- und Regelversorgung
- e) Spezialklinik (z.B. Orthopädische Klinik)
- f) Praxisklinik

**A3** Anzahl der Betten in meiner Klinik:

(Optional)

<Freitext>

### 1. Perioperative Sicherheitscheckliste

**1.0** Wird in Ihrem Haus eine perioperative Sicherheitscheckliste verwendet?

- a) Ja
- b) Nein

Wenn „Ja“ Fragebogen bei Frage 1.1 fortsetzen und 1.2 überspringen.

Wenn „Nein“ Fragebogen bei Frage 1.2 fortsetzen

#### 1.1

**1.1.1** Welche Sicherheitscheckliste verwenden Sie?

- a) WHO-Checkliste
- b) Nur Team-Time-Out
- c) SURPASS-Checkliste (SURgical Patient Safety System)
- d) Eigene, adaptierte Checkliste
- e) Andere: <Freitext>



**1.1.11 Herzchirurgie**

|                       |                       |                       |                       |                       |                       |                                |
|-----------------------|-----------------------|-----------------------|-----------------------|-----------------------|-----------------------|--------------------------------|
| Sehr gut              | gut                   | befriedigend          | ausreichend           | mangelhaft            | ungenügend            | Fachabteilung nicht vorhanden. |
| <input type="radio"/>          |

**1.1.12 HNO**

|                       |                       |                       |                       |                       |                       |                                |
|-----------------------|-----------------------|-----------------------|-----------------------|-----------------------|-----------------------|--------------------------------|
| Sehr gut              | gut                   | befriedigend          | ausreichend           | mangelhaft            | ungenügend            | Fachabteilung nicht vorhanden. |
| <input type="radio"/>          |

**1.1.13 Augenklinik**

|                       |                       |                       |                       |                       |                       |                                |
|-----------------------|-----------------------|-----------------------|-----------------------|-----------------------|-----------------------|--------------------------------|
| Sehr gut              | gut                   | befriedigend          | ausreichend           | mangelhaft            | ungenügend            | Fachabteilung nicht vorhanden. |
| <input type="radio"/>          |

**1.1.14 Thoraxchirurgie**

|                       |                       |                       |                       |                       |                       |                                |
|-----------------------|-----------------------|-----------------------|-----------------------|-----------------------|-----------------------|--------------------------------|
| Sehr gut              | gut                   | befriedigend          | ausreichend           | mangelhaft            | ungenügend            | Fachabteilung nicht vorhanden. |
| <input type="radio"/>          |

**1.1.15 Neurochirurgie**

|                       |                       |                       |                       |                       |                       |                                |
|-----------------------|-----------------------|-----------------------|-----------------------|-----------------------|-----------------------|--------------------------------|
| Sehr gut              | gut                   | befriedigend          | ausreichend           | mangelhaft            | ungenügend            | Fachabteilung nicht vorhanden. |
| <input type="radio"/>          |

**1.1.16 Gynäkologie/Geburtshilfe**

|                       |                       |                       |                       |                       |                       |                                |
|-----------------------|-----------------------|-----------------------|-----------------------|-----------------------|-----------------------|--------------------------------|
| Sehr gut              | gut                   | befriedigend          | ausreichend           | mangelhaft            | ungenügend            | Fachabteilung nicht vorhanden. |
| <input type="radio"/>          |

**1.1.17 Urologie**

|                       |                       |                       |                       |                       |                       |                                |
|-----------------------|-----------------------|-----------------------|-----------------------|-----------------------|-----------------------|--------------------------------|
| Sehr gut              | gut                   | befriedigend          | ausreichend           | mangelhaft            | ungenügend            | Fachabteilung nicht vorhanden. |
| <input type="radio"/>          |

**1.1.18 Sonstige (z.B. interventionelle Radiologie/Kardiologie, Endoskopie, MKG)**

|                       |                       |                       |                       |                       |                       |                                |
|-----------------------|-----------------------|-----------------------|-----------------------|-----------------------|-----------------------|--------------------------------|
| Sehr gut              | gut                   | befriedigend          | ausreichend           | mangelhaft            | ungenügend            | Fachabteilung nicht vorhanden. |
| <input type="radio"/>          |

**1.2** (Nur beantworten, wenn bislang keine Sicherheitscheckliste verwendet wurde, sonst Fragebogen bei 1.3. fortsetzen.)

**1.2.1** Wird geplant, in Ihrer Abteilung eine Sicherheitscheckliste zu implementieren?

- a) Ja
- b) Nein









## 4. Fehlerkultur

4.1 In meiner Anästhesieabteilung herrscht eine gute Fehlerkultur.

| Trifft voll und ganz zu |                       |                       |                       |                       | Trifft gar nicht zu   |
|-------------------------|-----------------------|-----------------------|-----------------------|-----------------------|-----------------------|
| <input type="radio"/>   | <input type="radio"/> | <input type="radio"/> | <input type="radio"/> | <input type="radio"/> | <input type="radio"/> |

4.2 In meinem Krankenhaus im Allgemeinen herrscht eine gute Fehlerkultur

| Trifft voll und ganz zu |                       |                       |                       |                       | Trifft gar nicht zu   |
|-------------------------|-----------------------|-----------------------|-----------------------|-----------------------|-----------------------|
| <input type="radio"/>   | <input type="radio"/> | <input type="radio"/> | <input type="radio"/> | <input type="radio"/> | <input type="radio"/> |

4.3 Über fehlerhafte Verläufe wird zu Lernzwecken innerhalb meiner Abteilung offen kommuniziert.

| Trifft voll und ganz zu |                       |                       |                       |                       | Trifft gar nicht zu   |
|-------------------------|-----------------------|-----------------------|-----------------------|-----------------------|-----------------------|
| <input type="radio"/>   | <input type="radio"/> | <input type="radio"/> | <input type="radio"/> | <input type="radio"/> | <input type="radio"/> |

4.4 Wenn innerhalb meiner Abteilung Jemandem ein Fehler unterläuft, wird diese Person bloßgestellt.

| Trifft voll und ganz zu |                       |                       |                       |                       | Trifft gar nicht zu   |
|-------------------------|-----------------------|-----------------------|-----------------------|-----------------------|-----------------------|
| <input type="radio"/>   | <input type="radio"/> | <input type="radio"/> | <input type="radio"/> | <input type="radio"/> | <input type="radio"/> |

4.5 Wenn ich einen Fehler begehe, behalte ich dies lieber für mich.

| Trifft voll und ganz zu |                       |                       |                       |                       | Trifft gar nicht zu   |
|-------------------------|-----------------------|-----------------------|-----------------------|-----------------------|-----------------------|
| <input type="radio"/>   | <input type="radio"/> | <input type="radio"/> | <input type="radio"/> | <input type="radio"/> | <input type="radio"/> |

4.6 Unterlaufen mir Fehler, habe ich Sorge vor rechtlichen Konsequenzen.

| Trifft voll und ganz zu |                       |                       |                       |                       | Trifft gar nicht zu   |
|-------------------------|-----------------------|-----------------------|-----------------------|-----------------------|-----------------------|
| <input type="radio"/>   | <input type="radio"/> | <input type="radio"/> | <input type="radio"/> | <input type="radio"/> | <input type="radio"/> |

4.7 Die Patientensicherheit in meinem Krankenhaus ist ausreichend gewährleistet.

| Trifft voll und ganz zu |                       |                       |                       |                       | Trifft gar nicht zu   |
|-------------------------|-----------------------|-----------------------|-----------------------|-----------------------|-----------------------|
| <input type="radio"/>   | <input type="radio"/> | <input type="radio"/> | <input type="radio"/> | <input type="radio"/> | <input type="radio"/> |

4.8 In meiner Abteilung finden Morbiditäts- und Mortalitätskonferenzen statt, in denen kritische Patientenverläufe aufgearbeitet werden.

- a) Ja
- b) Nein
- c) Weiß ich nicht.



## 5. Anästhesieausweis

5.1 Der Anästhesieausweis der DGAI steigert die Patientensicherheit.

| Trifft voll und ganz zu |                       |                       |                       |                       |                       | Trifft gar nicht zu |
|-------------------------|-----------------------|-----------------------|-----------------------|-----------------------|-----------------------|---------------------|
| <input type="radio"/>   | <input type="radio"/> | <input type="radio"/> | <input type="radio"/> | <input type="radio"/> | <input type="radio"/> |                     |

5.2 Nach Anästhesiekomplikationen (z.B. schwieriger Atemweg, Maligne Hyperthermie, Allergien) wird den betroffenen Patienten in meiner Klinik ein Anästhesieausweis ausgestellt.

| Trifft voll und ganz zu |                       |                       |                       |                       |                       | Trifft gar nicht zu |
|-------------------------|-----------------------|-----------------------|-----------------------|-----------------------|-----------------------|---------------------|
| <input type="radio"/>   | <input type="radio"/> | <input type="radio"/> | <input type="radio"/> | <input type="radio"/> | <input type="radio"/> |                     |

5.3 Bei Verlust eines Anästhesieausweises kann in meiner Klinik anhand der krankenhausinternen Dokumentation ein Ersatzexemplar jederzeit mit identischem Inhalt ausgestellt werden.

| Trifft voll und ganz zu |                       |                       |                       |                       |                       | Trifft gar nicht zu |
|-------------------------|-----------------------|-----------------------|-----------------------|-----------------------|-----------------------|---------------------|
| <input type="radio"/>   | <input type="radio"/> | <input type="radio"/> | <input type="radio"/> | <input type="radio"/> | <input type="radio"/> |                     |

5.4 Ein ausgefüllter Anästhesieausweis beeinflusst meine Narkoseplanung und Durchführung

| Trifft voll und ganz zu |                       |                       |                       |                       |                       | Trifft gar nicht zu |
|-------------------------|-----------------------|-----------------------|-----------------------|-----------------------|-----------------------|---------------------|
| <input type="radio"/>   | <input type="radio"/> | <input type="radio"/> | <input type="radio"/> | <input type="radio"/> | <input type="radio"/> |                     |

5.5 Welche Probleme zeigen sich im Umgang mit Anästhesieausweisen in der täglichen Praxis (Mehrfachantworten möglich)

- a) Der Ausweis wird von den Patienten nicht zur Prämedikation mitgebracht (vergessen/verloren)
- b) Handschriftliche Einträge sind nicht leserlich.
- c) Die Angaben auf dem Ausweis sind nicht präzise genug.
- d) Der Platz für Freitexteingaben ist zu gering.
- e) Sonstige <Freitext>

5.6 Welche Risiken/Komplikationen sollten auf einem Anästhesieausweis erfasst werden? (Mehrfachantworten möglich)

- a) Schwieriger Atemweg
- b) Maligne Hyperthermie
- c) Allergien
- d) Sonstige anästhesierelevante Stoffwechselerkrankungen
- e) Unerwartet langsamer Relaxansabbau
- f) Zentrales anticholinerges Syndrom
- g) Pseudocholinesterasemangel
- h) intraoperative kardiopulmonale Reanimation
- i) unerwartete postoperative Aufnahme auf Intensivstation
- j) Andere <Freitext>

5.7. Wer darf in Ihrer Abteilung Anästhesieausweise ausfüllen? (Mehrfachnennungen möglich)

- a) Alle ärztlichen Mitarbeiter
- b) Erfahrene Assistenzärzte
- c) Fachärzte
- d) Oberärzte
